# Supplementary material
Source: MDPI journal article supplement (https://www.mdpi.com/2673-9976/6/1/29)

## Introduction

### *Salicornia ramosissima*:

- ▶ Halophyte plant;
- ▶ Grows in saltmarshes, mainly in the coastline of Europe from the Arctic to the Mediterranean, including Portugal ;
- ▶ Tolerates high salt concentration;
- ▶ In gastronomy, is an alternative to salt and the leaves are used for human;
- ▶ Presents antioxidant, anti-inflammatory, anti-diabetic and anticancer properties.

### Microwave-assisted extraction (MAE):

- ▶ Alternative to conventional extractions (CE);
- ▶ Green extraction method;
- ▶ Quick heating, lower solvent requirements, clean process and low cost;
- ▶ High extraction rate and short extraction time;
- ▶ Recover of high-added value compounds.

#### References:

- [1] Flowers, T.J.; Colmer, T.D. *New Phytol.* **2008**, *179*, 945–963.  
[2] Lima, A.R.; et al. *Food Chem.* **2020**, *333*, 127525.  
[3] Ferreira, D.; et al. *Biomed. Pharmacother.* **2018**, *107*, 283–291.  
[4] Panja, P. *Curr. Opin. Food Sci.* **2018**, *23*, 173–182.

## Results

### Identification and quantification of phenolic compounds by HPLC-PDA

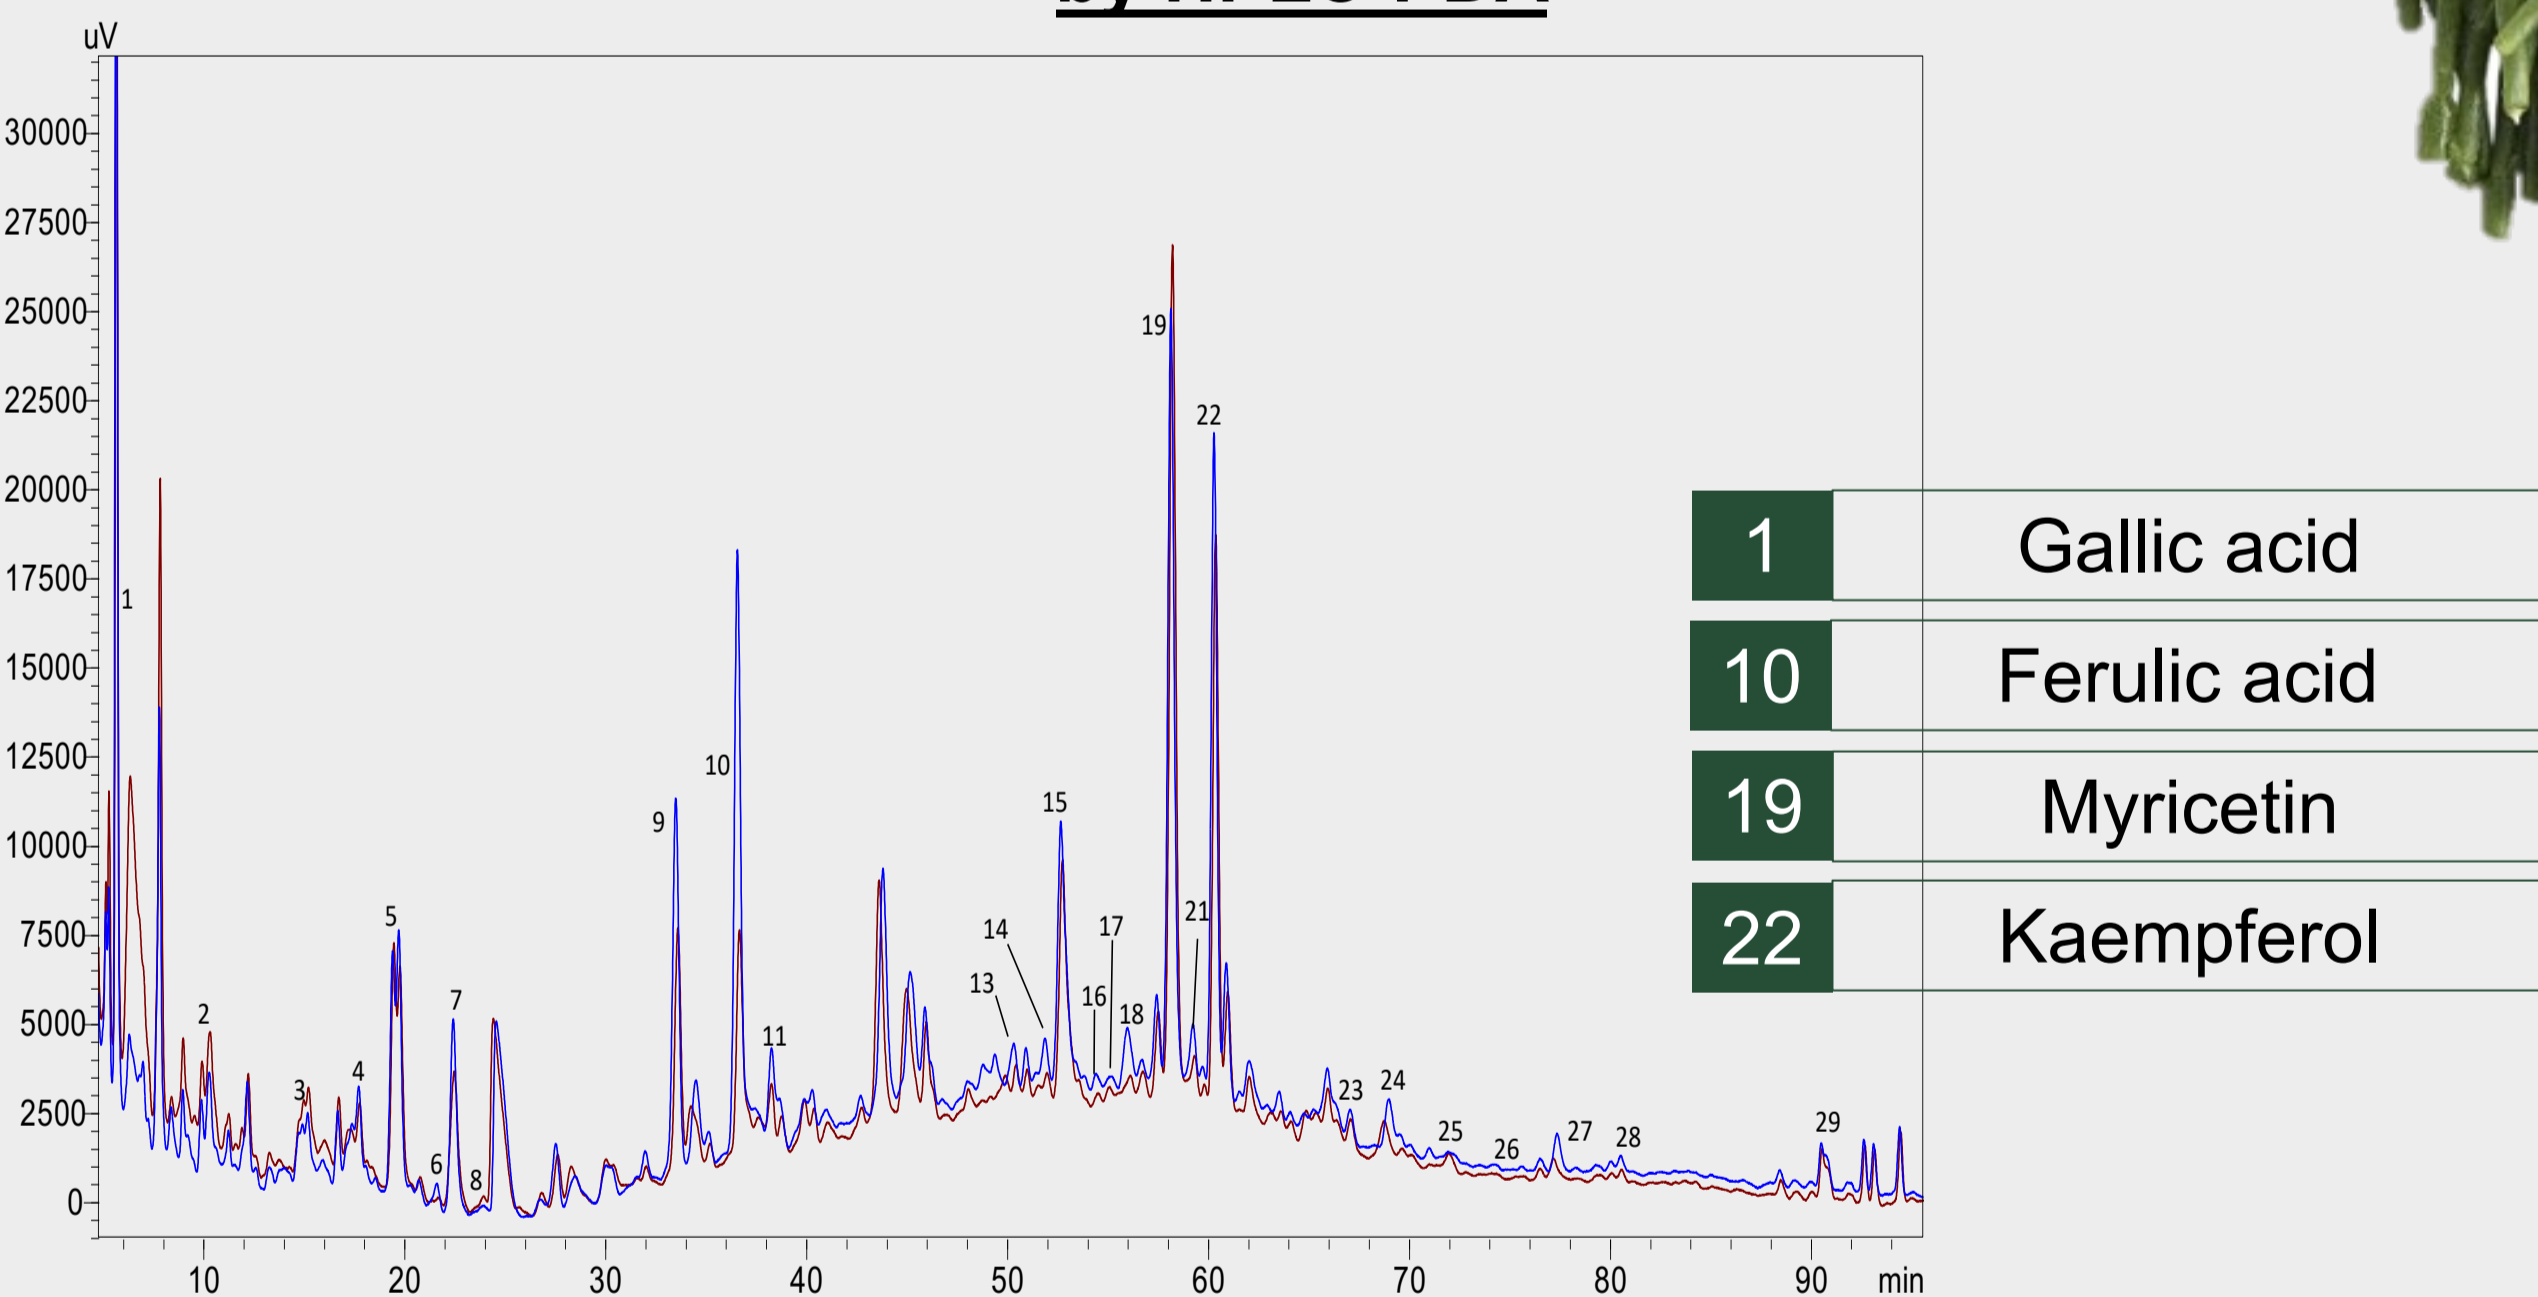

### Determination of TPC, TFC and antioxidant activities

| Extracts | TPC (mg GAE/g dw) | TFC (mg CAE/g dw) | ABTS (µg AAE/g dw) | FRAP (µmol FSE/g dw) |
|----------|-------------------|-------------------|--------------------|----------------------|
| CE       | 15.02 ± 2.01*     | 8.44 ± 0.45       | 15.55 ± 0.78       | 60.61 ± 6.64         |
| MAE      | 8.34 ± 1.22       | 8.41 ± 0.45       | 17.74 ± 2.95*      | 65.56 ± 8.68         |

Conventional extraction (CE); Microwave-assisted extraction (MAE); Gallic acid equivalents (GAE); Catechin equivalents (CAE); Ascorbic acid equivalents (AAE); Ferrous sulphate equivalents (FSE).

### Effect of *S. ramosissima* extracts in cell viability (%)

| Extracts |     | Concentration (µg/mL) |        |        |        |        |
|----------|-----|-----------------------|--------|--------|--------|--------|
|          |     | 0.1                   | 1      | 10     | 100    | 1000   |
| Caco-2   | CE  | 128.60                | 121.87 | 120.26 | 123.54 | 118.44 |
|          | MAE | 100.09                | 95.11  | 88.73  | 89.92  | 86.55  |
| HT29-MTX | CE  | 124.61                | 119.25 | 113.47 | 99.42  | 97.04  |
|          | MAE | 123.98                | 123.99 | 113.42 | 109.95 | 94.32  |

## Material and Methods

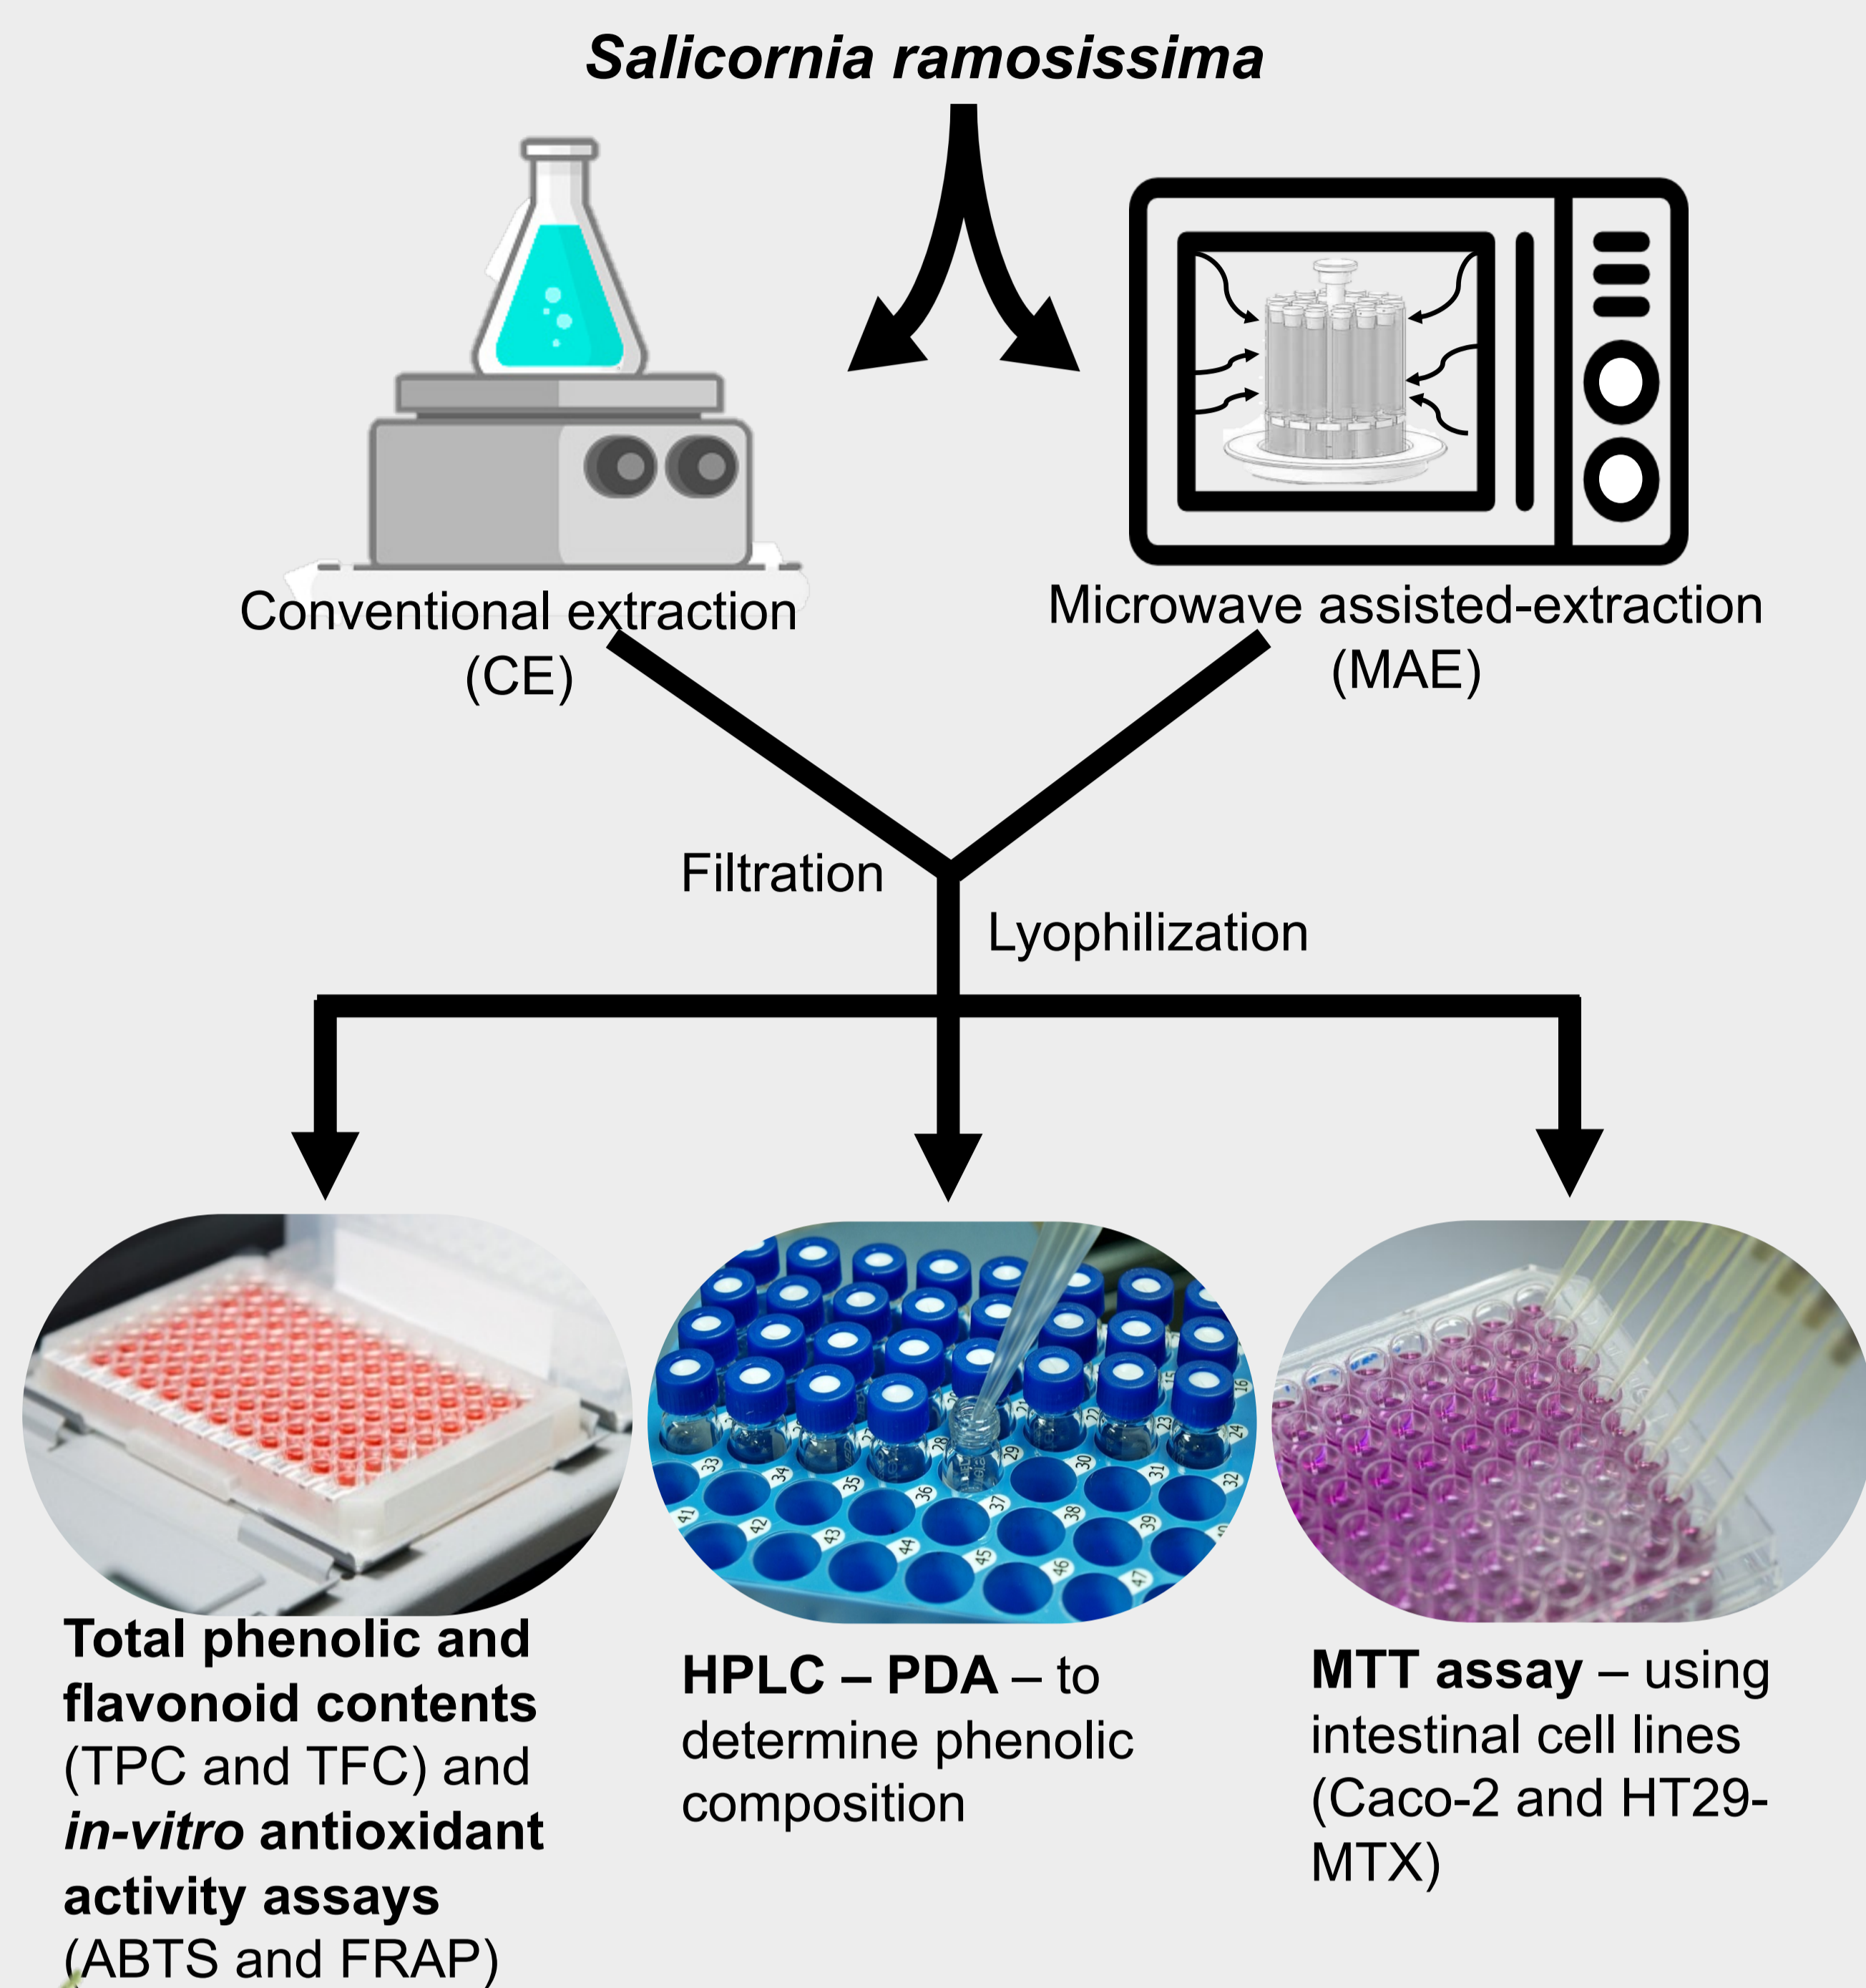

## Discussion

### Determination of TPC, TFC and antioxidant activities:

- ▶ For TPC and TFC, CE extract exhibited the highest values. The statistical analysis showed differences ( $p < 0.01$ ) in TPC assay between CE and MAE extracts.
- ▶ Regarding antioxidant activity, MAE showed the best results. For ABTS assay, the statistical analysis ( $p < 0.05$ ) revealed significant differences between extracts.

### Identification and quantification of phenolic compounds by HPLC-PDA:

- ▶ Phenolic acids and flavonols are the principal constituents, being responsible of 50% and 40% of the total phenolic composition.
- ▶ Myricetin was the compound present in highest amounts (0.4250 and 0.4655 mg myricetin/g dw for CE and MAE extracts, respectively).
- ▶ Gallic acid is the major phenolic acid found in both extracts (0.2105 and 0.1553 mg gallic acid/g dw, respectively).

### Effect of *S. ramosissima* extracts in cell viability:

- ▶ The viability of Caco-2 decreased to 86.55% after exposure to the highest concentration of MAE.
- ▶ The HT29-MTX viability did not decrease after exposure to the different concentrations. At the highest concentration tested, the viability was 97.04% and 94.32%, respectively, for the CE for MAE extracts.

## Conclusion

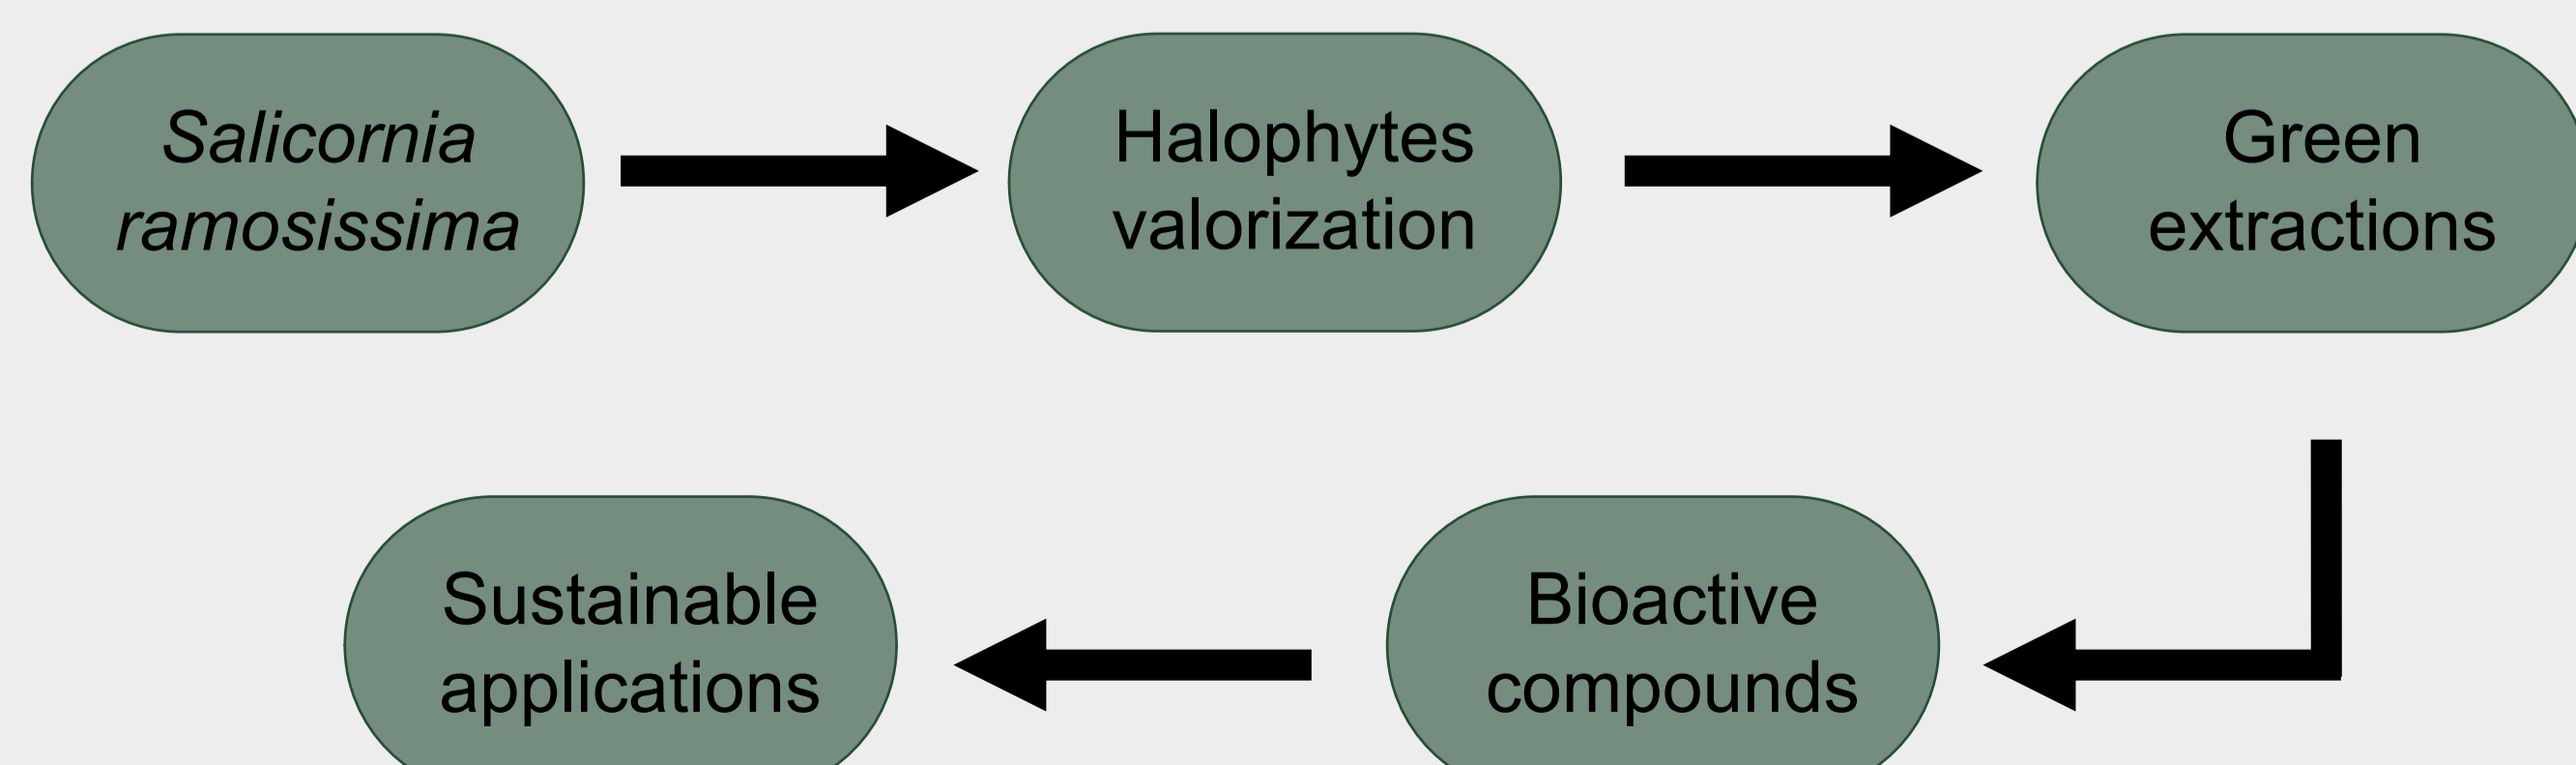

Supplement: s1 [file s1]
